# Supplementary material for: Quadratic Magnetic Gradients from 7-SC and 9-SC Constellations
Source: Copernicus journal article supplement (doi:10.5194/egusphere-2024-1330), 2024-05-17
Supplement: Supplementary file [file egusphere-2024-1330-AC2-supplement.zip]

# **Transformations of electromagnetic fields in different reference frames and their applications**

**Chao Shen**

Harbin Institute of Technology, Shenzhen, China

**Yong Ji**

Ningxia University, Yinchuan, China

2024.10.15, EGU, Vienna

# 1. Background

The transformation of electromagnetic fields across different frames of reference, whether inertial or non-inertial, is a common challenge encountered in electromagnetic space measurements and analyses.

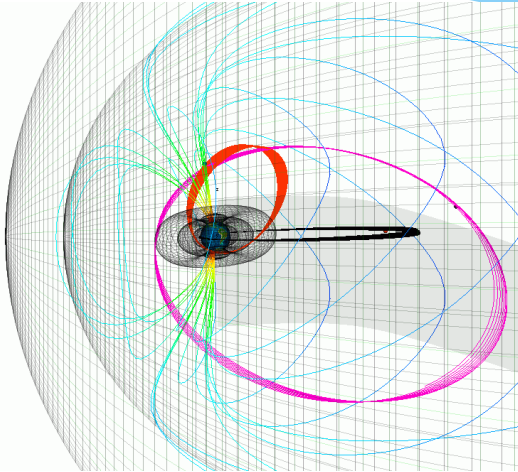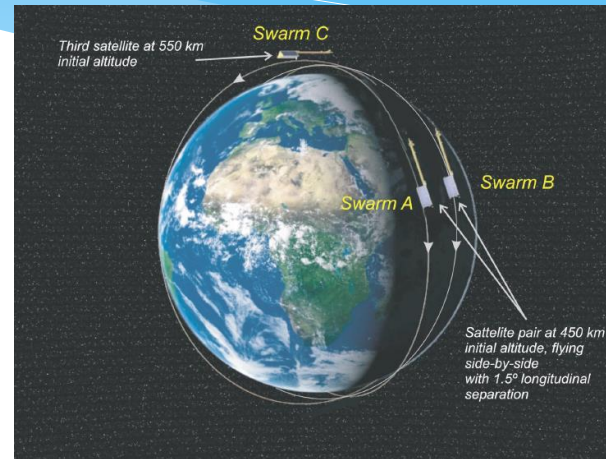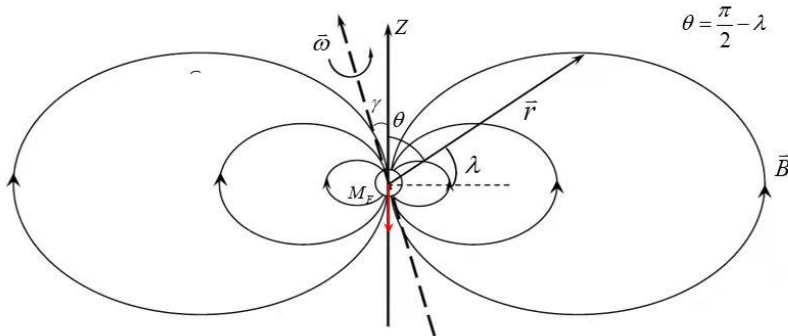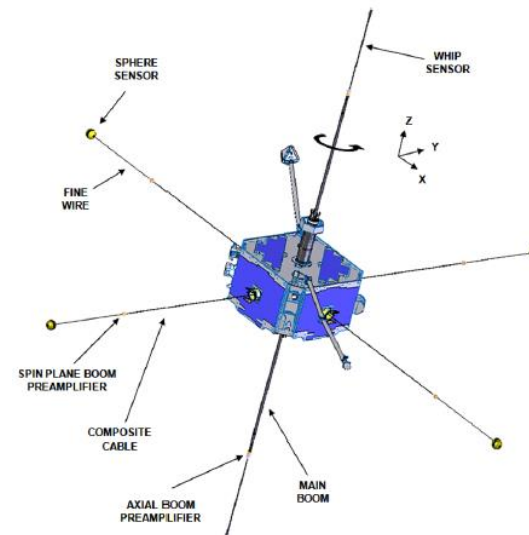

## 2. Lorentz transformations in low-speed moving reference frames

### 2.1 space-time transformation

The impact of the equivalent gravity on the non-inertial reference system is  $2\phi / c^2 \sim u^2 / c^2 \ll 1$ ,

**the physical laws for flat spacetime remain valid.**

Space-time coordinates in frame K:  $(x^\mu) = (x^0 = ct, \mathbf{x})$

Space-time coordinates in frame K':  $(x'^\mu) = (x'^0 = ct', \mathbf{x}')$

Lorentz transformations for space-time coordinates

$$dx'^\mu = \frac{\partial x'^\mu}{\partial x^\nu} dx^\nu = \Lambda_\gamma^\mu dx^\gamma \quad \frac{\partial}{\partial x'^\mu} = \frac{\partial x^\nu}{\partial x'^\mu} \frac{\partial}{\partial x^\nu} = \hat{\Lambda}_\mu^\nu \frac{\partial}{\partial x^\nu}$$

Lorentz transformation matrix

$$\Lambda_\gamma^\mu = \frac{\partial x'^\mu}{\partial x^\gamma} = \begin{pmatrix} \gamma & -\gamma\beta_j \\ -\gamma\beta_i & \delta_{ij} + \frac{\gamma^2}{\gamma+1} \beta_i \beta_j \end{pmatrix} \quad \hat{\Lambda}_\gamma^\mu = \frac{\partial x^\mu}{\partial x'^\gamma} = \begin{pmatrix} \gamma & \gamma\beta_j \\ \gamma\beta_i & \delta_{ij} + \frac{\gamma^2}{\gamma+1} \beta_i \beta_j \end{pmatrix} \quad \begin{aligned} \beta_i &= u_i / c \\ \gamma &= (1 - \beta^2)^{-1/2} \end{aligned}$$

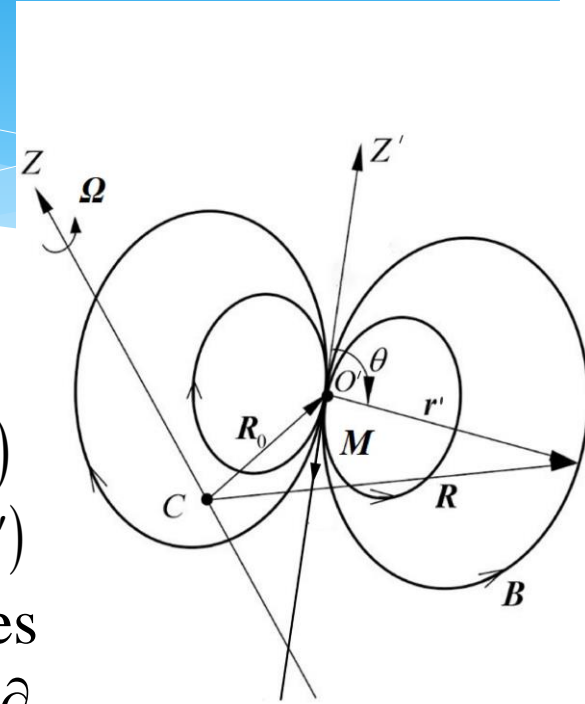

Local transformation of the spacetime coordinate

$$d\mathbf{x}' = d\mathbf{x} + \frac{\gamma^2}{(\gamma+1)c^2} (d\mathbf{x} \cdot \mathbf{u}) \mathbf{u} - \gamma \mathbf{u} dt$$

$$dt' = \gamma \left( dt - \mathbf{u} \cdot d\mathbf{x} / c^2 \right)$$

Superposition law of velocities

$$\mathbf{v}' = \frac{1}{1 - \mathbf{v} \cdot \mathbf{u} / c^2} \left[ \frac{1}{\gamma} \mathbf{v} - \mathbf{u} + \frac{\gamma}{\gamma+1} \cdot \frac{(\mathbf{v} \cdot \mathbf{u}) \mathbf{u}}{c^2} \right]$$

4-vector potential  $(\phi/c, \mathbf{A})$ , 4-current density,  $(c\rho, \mathbf{j})$

4-wave vector  $(\nu/c, \mathbf{k})$  .....

Local Lorentz transformation

$$p'^{\mu} = \Lambda_{\gamma}^{\mu} p^{\gamma}$$

The transformation of the electromagnetic tensor

$$F'^{\mu\nu} = \Lambda_{\lambda}^{\mu} \Lambda_{\sigma}^{\nu} F^{\lambda\sigma}$$

# The transformations of the electro-magnetic fields for non-inertial reference frames

$$\left\{ \begin{array}{l} \mathbf{E}' = \gamma \left( \mathbf{E} + \mathbf{u} \times \mathbf{B} - \frac{\gamma}{\gamma+1} (\mathbf{u} \cdot \mathbf{E}) \mathbf{u} / c^2 \right) \\ \mathbf{B}' = \gamma \left( \mathbf{B} - \frac{1}{c^2} \mathbf{u} \times \mathbf{E} - \frac{\gamma}{\gamma+1} (\mathbf{u} \cdot \mathbf{B}) \mathbf{u} / c^2 \right) \end{array} \right. \quad \left\{ \begin{array}{l} \phi' = \gamma (\phi - \mathbf{u} \cdot \mathbf{A}) \\ \mathbf{A}' = \mathbf{A} - \frac{\gamma^2}{c^2} \phi \mathbf{u} + \frac{\gamma^2}{(\gamma+1)c^2} (\mathbf{u} \cdot \mathbf{A}) \mathbf{u} \end{array} \right.$$

$$\left\{ \begin{array}{l} \mathbf{P}' = \gamma \left( \mathbf{P} - \frac{1}{c^2} \mathbf{u} \times \mathbf{M} - \frac{\gamma}{\gamma+1} (\mathbf{u} \cdot \mathbf{P}) \mathbf{u} / c^2 \right) \\ \mathbf{M}' = \gamma \left( \mathbf{M} + \mathbf{u} \times \mathbf{P} - \frac{\gamma}{\gamma+1} (\mathbf{u} \cdot \mathbf{M}) \mathbf{u} / c^2 \right) \end{array} \right. \quad \left\{ \begin{array}{l} \rho' = \gamma (\rho - \mathbf{u} \cdot \mathbf{j} / c^2) \\ \mathbf{j}' = \mathbf{j} - \gamma \rho \mathbf{u} + \frac{\gamma^2}{(\gamma+1)c^2} (\mathbf{u} \cdot \mathbf{j}) \mathbf{u} \end{array} \right.$$

$$\left\{ \begin{array}{l} \nu' = \gamma (\nu - \mathbf{u} \cdot \mathbf{k}) \\ \mathbf{k}' = \mathbf{k} - \frac{\gamma}{c} \mathbf{k} \mathbf{u} + \frac{\gamma^2}{(\gamma+1)c^2} (\mathbf{u} \cdot \mathbf{k}) \mathbf{u} \end{array} \right.$$

The errors are of the second order of  $u/c$ .

## Lorentz transformation matrix under the first-order approximation

$$(\Lambda_{\nu}^{\mu}) = \begin{pmatrix} 1 & -\beta_j \\ -\beta_i & \delta_{ij} \end{pmatrix}$$

The transformation of space-time coordinates for low speed cases

$$\begin{cases} d\mathbf{x}' = d\mathbf{x} - \mathbf{u} dt \\ dt' = dt - \frac{1}{c^2} \mathbf{u} \cdot d\mathbf{x} \end{cases}$$

The transformations of the electro-magnetic fields

$$\begin{cases} \phi' = \phi - \mathbf{u} \cdot \mathbf{A} \\ \mathbf{A}' = \mathbf{A} - \frac{1}{c^2} \phi \mathbf{u} \end{cases} \quad \begin{cases} \mathbf{E}' = \mathbf{E} + \mathbf{u} \times \mathbf{B} \\ \mathbf{B}' = \mathbf{B} - \frac{1}{c^2} \mathbf{u} \times \mathbf{E} \end{cases} \quad \begin{cases} \mathbf{P}' = \mathbf{P} - \frac{1}{c^2} \mathbf{u} \times \mathbf{M} \\ \mathbf{M}' = \mathbf{M} + \mathbf{u} \times \mathbf{P} \end{cases}$$

$$\begin{cases} \rho' = \rho - \mathbf{u} \cdot \mathbf{j} / c^2 \\ \mathbf{j}' = \mathbf{j} - \rho \mathbf{u} \end{cases} \quad \begin{cases} \nu' = \nu - \mathbf{k} \cdot \mathbf{u} \\ \mathbf{k}' = \mathbf{k} - \frac{1}{c} k \mathbf{u} \end{cases}$$

The errors are of the second order of  $u/c$ .

# 3. Transformations for electromagnetic fields in space plasmas

## 3.1 Galilean transformation for spacetime

Local Galilean transformation

$$\begin{cases} d\mathbf{x}' = d\mathbf{x} - \mathbf{u}dt \\ dt' = dt \end{cases}$$

Spacetime transform matrix

$$(\Lambda_{\nu}^{\mu}) = \begin{pmatrix} 1 & 0 \\ -\beta_j & \delta_{ij} \end{pmatrix}$$

Galilean velocity superposition  $\mathbf{v}' = \mathbf{v} - \mathbf{u}$

The transformations of spacetime gradients

$$\begin{cases} \frac{\partial}{\partial t'} = \frac{\partial}{\partial t} + \mathbf{u} \cdot \nabla_{\mathbf{x}} \\ \nabla_{\mathbf{x}'} = \nabla_{\mathbf{x}} \end{cases}$$

$$\begin{cases} \frac{\partial}{\partial t} = \frac{\partial}{\partial t'} - \mathbf{u} \cdot \nabla_{\mathbf{x}'} \\ \nabla_{\mathbf{x}} = \nabla_{\mathbf{x}'} \end{cases}$$

Total derivative  $\frac{D}{dt} \equiv \frac{\partial}{\partial t} + \mathbf{v} \cdot \nabla_{\mathbf{x}}$  satisfies  $\frac{D'}{dt'} = \frac{D}{dt}$

## 3.2 Galilean transformations for an electromagnetic field

Due to the high conductivity of space plasmas,  
The transform matrix for electromagnetic field is

$$(\Lambda_v^\mu) = \begin{pmatrix} 1 & -\beta_j \\ 0 & \delta_{ij} \end{pmatrix}$$

The transformations of the electro-magnetic fields

$$\begin{cases} \phi' = \phi - \mathbf{u} \cdot \mathbf{A} \\ \mathbf{A}' = \mathbf{A} \end{cases} \quad \begin{cases} \mathbf{E}' = \mathbf{E} + \mathbf{u} \times \mathbf{B} \\ \mathbf{B}' = \mathbf{B} \end{cases} \quad \begin{cases} \mathbf{P}' = \mathbf{P} - \frac{1}{c^2} \mathbf{u} \times \mathbf{M} \\ \mathbf{M}' = \mathbf{M} \end{cases}$$

$$\begin{cases} \rho' = \rho - \mathbf{u} \cdot \mathbf{j} / c^2 \\ \mathbf{j}' = \mathbf{j} \end{cases} \quad \begin{cases} \nu' = \nu - \mathbf{u} \cdot \mathbf{k} \\ \mathbf{k}' = \mathbf{k} \end{cases}$$

For each group of Eqs., the error for the 1<sup>st</sup> Eq is of the second order of  $u/c$ , and that for the 2<sup>nd</sup> Eq. is of the first order of  $u/c$ .



### 3.3 Galilean transformations for the spatial and temporal gradients of the electromagnetic field

The gradients of magnetic field are invariants for different frames

$$\nabla' \mathbf{B}' = \nabla \mathbf{B}$$

$$\nabla' \nabla' \mathbf{B}' = \nabla \nabla \mathbf{B}$$

$$\nabla' \nabla' \nabla' \mathbf{B}' = \nabla \nabla \nabla \mathbf{B}$$

Relationships between the spatial and temporal gradients of the electromagnetic field

$$\begin{cases} \partial_t \mathbf{B} = -\mathbf{u} \cdot \nabla \mathbf{B} \\ \partial_t \nabla \mathbf{B} = -\mathbf{u} \cdot \nabla \nabla \mathbf{B} \end{cases}$$

These formulas are commonly used to calculate the structures' relative velocities and partial components of the magnetic gradients.

For low-speed space plasmas, the Coulomb gauge is valid:

$$\nabla \cdot \mathbf{A} = \nabla' \cdot \mathbf{A}' = 0$$

# 4. Application 1: Corotational potential of planets with intrinsic magnetic fields

The dipole magnetic field of a planet

$$\mathbf{B}' = \frac{3\mathbf{r}'(\mathbf{r}' \cdot \mathbf{M}) - r'^2 \mathbf{M}}{r'^5} \quad \mathbf{A}' = \frac{\mathbf{M} \times \mathbf{r}'}{r'^3}$$

Corotation electric field observed in the planetary centroid reference frame

$$\mathbf{E}_{cor} = -\mathbf{u} \times \mathbf{B}' = -(\boldsymbol{\Omega} \times \mathbf{R}) \times \mathbf{B}'$$

The corotation potential

$$\phi_{cor} = \mathbf{u} \cdot \mathbf{A}' = \frac{1}{r'^3} [(\mathbf{M} \cdot \boldsymbol{\Omega})(\mathbf{R} \cdot \mathbf{r}') - (\mathbf{M} \cdot \mathbf{R})(\boldsymbol{\Omega} \cdot \mathbf{r}')] ]$$

If the magnetic core coincides with the planetary centroid, and the magnetic moment is aligned with the rotation axis, then

$$\phi_{cor} = \frac{\Omega M \sin^2 \theta'}{r'} = \frac{\Omega M}{LR_p}$$

(Note: the divergence is not strictly zero :  $\nabla \cdot \mathbf{E}_{cor} = 2\mathbf{B}' \cdot \boldsymbol{\Omega}$  )

The error is of the first order of  $u/c$

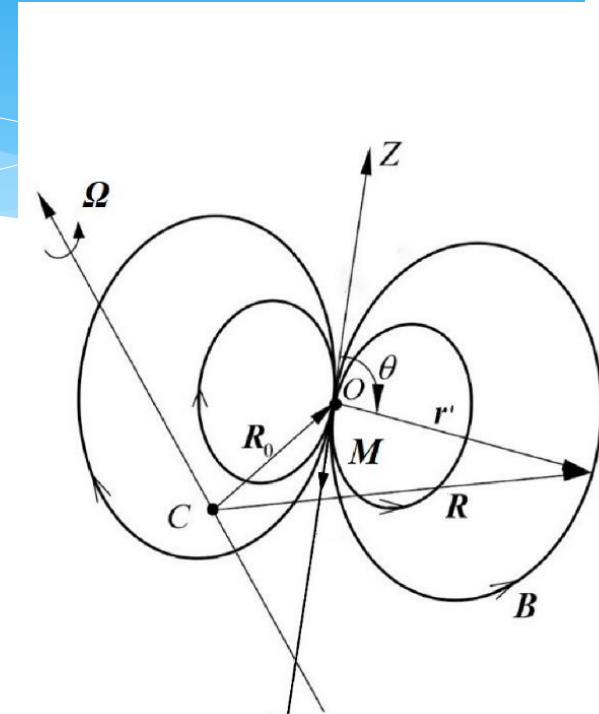

# 5. Application 2: Charge density deduced from the electric potential measurements by constellations

The analysis involves transformations among four different reference frames:

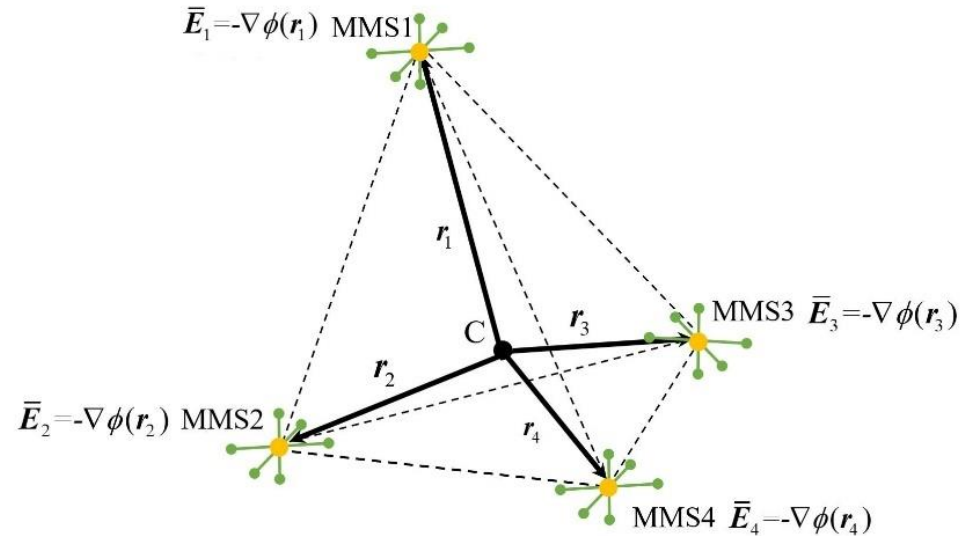

- (1) Spacecraft rotational reference frames  $\tilde{K}$  :  $\mathbf{E} = -\nabla_{\tilde{\mathbf{r}}} \phi - \partial_{\tilde{t}} \mathbf{A}$
- (2) Spacecraft centroid reference frames  $K_s$  :  $\mathbf{E}_s = -(\nabla_s \phi) - \frac{\partial}{\partial t_s} \mathbf{A}_s = \bar{\mathbf{E}}_s - \frac{\partial}{\partial t_s} \mathbf{A}_s$
- (3) Constellation centroid reference frame  $K$  :  $\mathbf{E} = \mathbf{E}_s - \mathbf{v} \times \mathbf{B} = \bar{\mathbf{E}} - \frac{\partial}{\partial t_s} \mathbf{A}_s$

**Charge density:**  $\rho = \epsilon_0 \nabla \cdot \mathbf{E} = \epsilon_0 \nabla \cdot \bar{\mathbf{E}}$

- (4) Proper reference frame of the structure  $K'$  :  

$$\rho' = \rho - \frac{1}{c^2} \mathbf{V} \cdot \mathbf{j} = \epsilon_0 \left( \nabla \cdot \bar{\mathbf{E}} \right)_c - \frac{1}{c^2} \mathbf{V} \cdot \mathbf{j}$$

The error is at the first order of  $u/c$ .

# 6. Conclusions

- \* (1) The Lorentz transformation is suitable for electromagnetic field transformations between any low-speed reference frames, whether inertial or non-inertial.
- \* (2) Approximate transformations for electromagnetic fields in various reference frames for low-speed, slow-varying space plasmas.
- \* (3) A general formula for the planetary corotation electric field is presented.
- \* (4) verifying the deduction of charge density from MMS electrostatic field measurements



**Thank You for your  
Attention !**

## 3.4 Eqs of MHD obey Galilean transformations

Equations of MHD contains

$$\frac{D\rho_m}{dt} + \rho_m \nabla \cdot (\mathbf{v}) = 0$$

$$\rho_m \frac{D\mathbf{v}}{dt} = \mathbf{J} \times \mathbf{B} - \nabla p$$

$$\nabla \times \mathbf{B} = \mu_0 \mathbf{J}$$

$$\nabla \times \mathbf{E} = -\frac{\partial \mathbf{B}}{\partial t}$$

$$\nabla \cdot \mathbf{B} = 0$$

$$\nabla \cdot \mathbf{E} = \varepsilon_0^{-1} \rho_e$$

$$\nabla \cdot \mathbf{J} = 0$$

$$\mathbf{J} = \sigma_0 (\mathbf{E} + \mathbf{v} \times \mathbf{B})$$

They are invariant under the following Galilean transformations :

$$\mathbf{v}' = \mathbf{v} - \mathbf{u}$$

$$\frac{\partial}{\partial t'} = \frac{\partial}{\partial t} + \mathbf{u} \cdot \nabla_{\mathbf{x}}$$

$$\nabla_{\mathbf{x}'} = \nabla_{\mathbf{x}}$$

$$\frac{D'}{dt'} = \frac{D}{dt}$$

$$\mathbf{B}' = \mathbf{B}$$

$$\mathbf{E}' = \mathbf{E} + \mathbf{u} \times \mathbf{B}$$

$$\mathbf{J}' = \mathbf{J}$$

$$\rho_e' = \rho_e - \mathbf{u} \cdot \mathbf{J} / c^2$$
